# Supplementary material
Source: MDPI journal article supplement (https://www.mdpi.com/2304-6740/10/12/237)
Supplement: s1 [file s1]

## Supporting Information

### Spontaneous Release of Metalloradicals and Coordinatively Unsaturated Species in Asymmetric Iridium Dimers to Promote C-N Bond Formation

Tsun-Ren Chen<sup>1,\*</sup>, Yi-Sheng Chen,<sup>1</sup> Chia-Ying Li,<sup>1</sup> Yen-Hsing Lin<sup>1</sup> and  
Yu-Tung Chen<sup>1</sup>

<sup>1</sup>Department of Applied Chemistry, National Pingtung University,  
Pingtung, Taiwan, 90003

\* Corresponding author: Tsun-Ren Chen      Phone: 886-933-261-376  
Email: trchen@mail.nptu.edu.tw;      Fax: 886-8-723-0305

**Table S1.** The Atomic Coordinates (angstroms) of Complex **1**

| Center<br>Number | Element | Coordinates (Angstroms) |           |           |
|------------------|---------|-------------------------|-----------|-----------|
|                  |         | X                       | Y         | Z         |
| 1                | C       | 1.759466                | 3.929059  | 1.656433  |
| 2                | C       | 1.123239                | 3.071809  | 0.789364  |
| 3                | C       | 4.412344                | 0.483472  | 3.130124  |
| 4                | C       | 3.429838                | 0.659815  | 2.157881  |
| 5                | C       | 2.915795                | -0.401239 | 1.427138  |
| 6                | C       | 3.300296                | -1.710078 | 1.727891  |
| 7                | C       | 4.268627                | -1.921534 | 2.729465  |
| 8                | C       | 4.837317                | -0.825368 | 3.417039  |
| 9                | C       | 2.767394                | 1.961569  | 1.764581  |
| 10               | Cl      | 4.776036                | -3.560012 | 3.123784  |
| 11               | C       | 1.102507                | -2.931705 | -0.572117 |
| 12               | C       | 1.516088                | -3.817465 | -1.538880 |
| 13               | C       | 2.504737                | -1.863045 | -1.917520 |
| 14               | C       | 3.788604                | 1.621335  | -1.603776 |
| 15               | C       | 3.072987                | 0.430515  | -1.463184 |
| 16               | C       | 3.326953                | -0.644964 | -2.304887 |
| 17               | C       | 4.247624                | -0.561919 | -3.348246 |
| 18               | C       | 4.960270                | 0.638708  | -3.516314 |
| 19               | C       | 4.738778                | 1.724339  | -2.638641 |
| 20               | Cl      | 5.653428                | 3.214285  | -2.841332 |
| 21               | C       | -1.739991               | 3.829111  | 1.685209  |
| 22               | C       | -1.366629               | 3.075947  | 0.603416  |
| 23               | C       | -2.327360               | 1.735105  | 2.079938  |
| 24               | C       | -2.996322               | 0.426196  | 2.443178  |
| 25               | C       | -3.740406               | 0.158862  | 3.590722  |
| 26               | C       | -4.368718               | -1.094099 | 3.699467  |
| 27               | C       | -4.241355               | -2.043125 | 2.659707  |
| 28               | C       | -3.454330               | -1.757404 | 1.526490  |
| 29               | C       | -2.802338               | -0.524499 | 1.452242  |
| 30               | Cl      | -5.067149               | -3.592435 | 2.783103  |
| 31               | N       | -1.735491               | 1.724064  | 0.912697  |
| 32               | O       | -2.245813               | 3.007288  | 2.779248  |
| 33               | N       | 1.831017                | 1.825986  | 0.863787  |
| 34               | N       | 1.725014                | -1.678991 | -0.883174 |

Spontaneous Release of Metalloradicals and Coordinatively Unsaturated Species in Asymmetric Iridium Dimers to Promote C-N Bond Formation

|    |    |           |           |           |
|----|----|-----------|-----------|-----------|
| 35 | O  | 2.486485  | -3.217094 | -2.451118 |
| 36 | O  | 2.959614  | 3.325484  | 2.227728  |
| 37 | C  | -0.963312 | -2.986621 | -0.658178 |
| 38 | C  | -1.381923 | -3.862039 | -1.632376 |
| 39 | C  | -2.355746 | -1.905210 | -1.994760 |
| 40 | C  | -3.269486 | -0.735436 | -2.294014 |
| 41 | C  | -3.047894 | 0.315047  | -1.414133 |
| 42 | C  | -3.826252 | 1.472513  | -1.492002 |
| 43 | C  | -4.814042 | 1.562811  | -2.492406 |
| 44 | C  | -5.010556 | 0.498515  | -3.400816 |
| 45 | C  | -4.229539 | -0.666042 | -3.302035 |
| 46 | N  | -1.595763 | -1.731334 | -0.946159 |
| 47 | O  | -2.188289 | -3.193036 | -2.648220 |
| 48 | Cl | -5.807801 | 3.010395  | -2.612663 |
| 49 | Ir | 1.604864  | 0.107694  | -0.070861 |
| 50 | Ir | -1.529499 | 0.026388  | -0.062206 |
| 51 | Cl | 0.005198  | 0.996670  | -1.340679 |
| 52 | O  | 0.052605  | -0.537469 | 0.922236  |
| 53 | H  | -5.755796 | 0.578683  | -4.164392 |
| 54 | H  | -4.370185 | -1.479940 | -3.982201 |
| 55 | H  | -3.673123 | 2.278171  | -0.804661 |
| 56 | H  | -3.353146 | -2.474824 | 0.739124  |
| 57 | H  | -4.946651 | -1.328467 | 4.568985  |
| 58 | H  | -3.835900 | 0.890079  | 4.366033  |
| 59 | H  | 5.672962  | 0.730040  | -4.309221 |
| 60 | H  | 4.410448  | -1.392335 | -4.003035 |
| 61 | H  | 3.615954  | 2.442119  | -0.939371 |
| 62 | H  | 2.870906  | -2.537653 | 1.202898  |
| 63 | H  | 5.590112  | -0.992179 | 4.158913  |
| 64 | H  | 4.828440  | 1.321873  | 3.648669  |
| 65 | C  | -0.181152 | -5.630863 | -0.528190 |
| 66 | C  | 0.292095  | -4.701098 | 0.435830  |
| 67 | C  | -1.009916 | 5.879499  | 0.460557  |
| 68 | C  | -0.588878 | 5.024487  | -0.599358 |
| 69 | C  | 0.100015  | 5.605578  | 1.181604  |
| 70 | C  | -0.509847 | 4.729590  | 0.244311  |
| 71 | C  | -1.029945 | -5.208984 | -1.576068 |
| 72 | C  | -0.106665 | -3.351168 | 0.372943  |

Spontaneous Release of Metalloradicals and Coordinatively Unsaturated Species in Asymmetric Iridium Dimers to Promote C-N Bond Formation

|    |   |           |           |           |
|----|---|-----------|-----------|-----------|
| 73 | C | -1.592246 | 5.343215  | 1.625999  |
| 74 | C | -0.767722 | 3.618871  | -0.532340 |
| 75 | C | 0.009021  | 3.435116  | 0.043348  |
| 76 | C | 1.248731  | 5.202516  | 1.898940  |
| 77 | H | -0.439911 | 2.757513  | -0.652524 |
| 78 | H | -1.366929 | 5.052734  | -0.308799 |
| 79 | H | -0.312626 | 6.579275  | 1.344227  |
| 80 | H | 1.715462  | 5.857841  | 2.604337  |
| 81 | H | -1.911165 | 5.969700  | 2.432742  |
| 82 | H | -0.880695 | 6.937895  | 0.371198  |
| 83 | H | -0.129953 | 5.452704  | -1.465925 |
| 84 | H | -0.453908 | 2.989196  | -1.338457 |
| 85 | H | 0.232867  | -2.636489 | 1.093207  |
| 86 | H | 0.951039  | -5.027191 | 1.213190  |
| 87 | H | 0.109110  | -6.658578 | -0.461488 |
| 88 | H | -1.388207 | -5.902729 | -2.307678 |
| 89 | C | 1.008515  | -5.114918 | -1.575172 |
| 90 | C | 0.230697  | -3.277124 | 0.453071  |
| 91 | C | 0.103829  | -5.504827 | -0.562423 |
| 92 | C | -0.275179 | -4.591858 | 0.457037  |
| 93 | H | -0.048277 | -2.571464 | 1.207464  |
| 94 | H | -0.948176 | -4.902607 | 1.228674  |
| 95 | H | -0.297842 | -6.496563 | -0.562773 |
| 96 | H | 1.298601  | -5.797745 | -2.346180 |
